1 **The human claustrum is functionally connected to cognitive networks and involved in**  
2 **cognitive control**

3

4 Abbreviated title: Claustrum activation during cognition

5 Samuel R. Krimmel<sup>1</sup>, Michael G. White<sup>2</sup>, Matthew H. Panicker<sup>3</sup>, Frederick S. Barrett<sup>4</sup>, and Brian  
6 N. Mathur<sup>3\*</sup>, David A. Seminowicz<sup>1\*</sup>

7 <sup>1</sup>Department of Neural and Pain Sciences, School of Dentistry, and Center to Advance Chronic  
8 Pain Research, University of Maryland, Baltimore, MD, 21201, USA. <sup>2</sup>Department of Biology,  
9 Stanford University, Stanford, CA, 94305. <sup>3</sup>Department of Pharmacology, School of Medicine,  
10 University of Maryland, Baltimore, MD, 21201, USA. <sup>4</sup>Department of Psychiatry and Behavioral  
11 Sciences, Johns Hopkins University School of Medicine, Baltimore, MD, 21224, USA.

12

13 \*co-senior authors

14

15 Acknowledgments: This work was supported by National Institute on Alcohol Abuse and  
16 Alcoholism grants K22AA021414, R01AA024845 (B.N.M.) and F31AA024683 (M.H.P.),  
17 Whitehall Foundation grant 2014-12-68 (B.N.M.), National Institute of General Medical Sciences  
18 grant T32008181 (M.G.W.), National Institute of Neurological Disorders and Stroke grant  
19 T32NS063391 (M.G.W.), National Institute on Drug Abuse grant R03DA042336 (F.S.B.), and  
20 National Center for Complementary and Integrative Health grant R01AT007176 (D.A.S.); The  
21 authors also are grateful for the assistance of Dr. Rao Gullapalli and the Core for Translational  
22 Research in Imaging @ Maryland (C-TRIM) and the Center for Metabolic Imaging and  
23 Therapeutics (CMIT).

24

25 Author contributions: DAS and BNM conceived of the research. DAS, SK, MGW, and BNM  
26 designed research. MP generated claustrum masks. DAS, SK, FSB, MGW and BNM analyzed  
27 data. DAS, SK, and BNM wrote the manuscript.

28 **Key words:** top-down, insula, striatum, putamen, thalamus, anterior cingulate cortex, cognitive  
29 control, attention, cortex, forebrain

30 \*Correspondence:

31 Brian N. Mathur

32 BRB RM 4011

33 655 West Baltimore St.

34 Baltimore, MD 21201

35 Phone: 410-706-8239

36 Fax: 410-706-8341

37 [bmathur@som.umaryland.edu](mailto:bmathur@som.umaryland.edu)

38 Manuscript information: 23 pages; 4 figures; 1 supplemental figure; 5 supplemental tables; 210  
39 words in abstract; 559 words in introduction; 839 words in discussion.

40 No conflicts of interest to disclose.

41

## 42 **Abstract**

43 The claustrum is among the most highly connected structures in the mammalian brain.  
44 However, the function of the claustrum is unknown, which is due to its peculiar anatomical  
45 arrangement. Here, we use resting state and task functional magnetic resonance imaging  
46 (fMRI) to elucidate claustrum function in human subjects. We first describe a method to reveal  
47 claustrum signal with no linear relationship with adjacent regions. We applied this approach to  
48 resting state functional connectivity (RSFC) analysis of the claustrum at high resolution (1.5 mm  
49 isotropic voxels) using a 7T dataset (n=20) and a separate 3T dataset for replication (n=35). We  
50 then assessed claustrum activation during performance of a cognitive task, the multi-source  
51 interference task, at 3T (n=33). Extensive functional connectivity was observed between  
52 claustrum and cortical regions associated with cognitive control, including anterior cingulate,  
53 prefrontal and parietal cortices. Cognitive task performance was associated with widespread  
54 activation and deactivation that overlapped with the cortical areas showing functional  
55 connectivity to the claustrum. Furthermore, the claustrum was significantly activated at the onset  
56 of the difficult condition of the task, but not during the remainder of the difficult condition. These  
57 data suggest that the claustrum can be functionally isolated with fMRI, and that it is involved in  
58 cognitive control in humans independent of sensorimotor processing.

## 59 **Highlights**

- 60 • Removing signal from neighboring structures isolates claustrum BOLD signal at 7T and  
61 3T field strength
- 62 • Claustrum is extensively functionally connected with cortex, including cognitive networks
- 63 • Claustrum is activated at the onset of a cognitive conflict task
- 64 • Claustrum may be involved in cognition independent of sensorimotor processing

65

66

## 67 **Introduction**

68 In its mediolateral dimension, the claustrum is thin (submillimeter at certain points), but its  
69 rostrocaudal and dorsoventral dimensions are roughly equivalent to that of the striatum.  
70 Decades of tract tracing studies in several mammalian species indicate that the claustrum is  
71 bidirectionally connected with many cortical areas (Edelstein and Denaro, 2004; Crick and Koch,  
72 2005; Mathur et al., 2009; Mathur, 2014; White et al., 2017; Wang et al., 2017) and is estimated  
73 by volume to be among the most highly connected structures in the brain (Torgerson et al.,  
74 2015). These observations have fueled several hypotheses that the claustrum: 1) binds  
75 multimodal sensory information for the generation of conscious perception (Crick and Koch,  
76 2005); 2) coordinates somatosensory and motor cortical information (Smith et al., 2012) and; 3)  
77 acts as a cortico-cortical relay center supporting attention (Mathur, 2014).

78 Recent comprehensive analyses in a single species of how the cortical mantle connects  
79 with the claustrum demonstrate that the claustrum weakly innervates primary sensorimotor  
80 cortices, while heavily innervating frontal cortices including the anterior cingulate cortex (ACC)  
81 and the prelimbic area of the medial prefrontal cortex (PFC) (White et al., 2017). A strong input  
82 from the ACC to the claustrum also exists in rats (Smith and Alloway, 2010; White et al., 2017)  
83 and mice, and this input encodes a top-down preparatory signal that is proportional to task  
84 difficulty (White et al., 2018). These findings suggest that the claustrum may subserve frontal  
85 cortical function, including top-down executive processes (Mathur, 2014; White and Mathur,  
86 2018). However, evidence for a role of the human claustrum supporting any of the  
87 aforementioned functional hypotheses, including cognitive processing, is particularly lacking.  
88 While the anatomical boundaries of the human claustrum can be resolved with relative ease  
89 using high-resolution structural magnetic resonance imaging (MRI), functionally resolving this  
90 structure for analysis of blood-oxygenation level-dependent (BOLD) signal with functional MRI  
91 (fMRI) is challenging, as the signal extracted from the claustrum is heavily mixed with the signal

92 from the neighboring insula and putamen using standard methods. Analysis of BOLD data using  
93 standard methods results in similar patterns of functional connectivity (correlation of signal  
94 between regions) when comparing claustrum, insula, and putamen. This contrasts with data  
95 from multiple tract tracing studies, which instead show unique patterns of anatomical  
96 connectivity across these regions (Nakashima et al., 2000; Mathur et al., 2009; Pan et al., 2010;  
97 Sato et al., 2013; Wang et al., 2017). Thus, standard fMRI analyses are not capable of  
98 functionally resolving the claustrum and may yield inaccurate functional connectivity and  
99 activation results.

100 In an effort to elucidate claustrum function, the current study has three goals: 1) devise new  
101 fMRI methodology called Small Region Confound Correction (SRCC) to functionally distinguish  
102 the claustrum from the insula and putamen, creating a corrected claustrum timeseries; 2)  
103 perform resting state functional connectivity analyses with the corrected claustrum timeseries to  
104 reveal functional coupling of the claustrum in humans; and 3) test the hypothesis that the  
105 claustrum, owing to strong connectivity with frontal cortices and recent data in mice suggesting  
106 its involvement in top-down cognitive processing (White et al., 2018), is activated during a  
107 cognitive conflict task. Our data indicate that extraction of unique claustrum signal using fMRI is  
108 possible and that the claustrum is functionally connected with cognitive networks in the resting  
109 state. During task performance, we found the claustrum to be active at the onset of – or switch  
110 to – cognitive conflict task engagement.

## 111 **Methods**

### 112 *Overview*

113 Three datasets were analyzed. The first dataset, *7T-Rest*, is publicly available and consisted of  
114 scans from 20 healthy humans scanned with 7 Tesla (T) MRI (Gorgolewski et al., 2015). The  
115 second dataset, *3T-Rest*, consisted of scans from 35 healthy humans acquired with 3T MRI.

116 The third dataset, *3T-Task*, used the same subjects as *3T-Rest* and consisted of scans from 33  
117 healthy humans performing a cognitive interference task acquired with 3T MRI. In *7T-Rest*, we  
118 performed seed-based whole-brain resting state functional connectivity (RSFC) analyses using  
119 the claustrum and surrounding structures (insula/putamen) as seeds. To examine claustrum  
120 functional connectivity while controlling for the influence of insula and putamen signal, we  
121 regressed out the timeseries of insula/putamen sub-regions from the claustrum, creating a  
122 corrected claustrum signal that we then used to make a claustrum specific RSFC map. We used  
123 *3T-Rest* to replicate findings from *7T-Rest*. We applied similar methods used in resting state  
124 data to *3T-Task* in order to isolate BOLD signal from the claustrum, and analyzed this signal to  
125 determine claustrum activation during cognitive load.

#### 126 *Participants and MRI data*

127 *7T-Rest*: Data from 22 subjects were acquired from a publically available dataset scanned on a  
128 7T MR scanner (MAGNETOM 7T, Siemens Healthcare, Erlangen, Germany). We used data  
129 from only the first session of this dataset. These data included a T1 weighted structural 3D  
130 MP2RAGE image that was used in preprocessing (TR=5000ms, TE=2.45ms, voxels=.7 mm  
131 isotropic). *7T-Rest* also included two eyes-open resting state scans using echo planar imaging  
132 (EPI) to measure BOLD fMRI while fixating on a plus sign (whole brain coverage, TR=3000ms,  
133 TE=17ms, voxels=1.5mm isotropic, slices=70, duration=300 TR). Details of the scans can be  
134 found in (Gorgolewski et al., 2015). Two subjects were excluded, one from errors induced by  
135 preprocessing and a second from different scanning parameters than the other participants,  
136 leaving 20 subjects for analysis (10 women, average age = 25, s.d. = 2).

137 *3T-Rest*. 36 healthy subjects were recruited as a control sample for an ongoing clinical trial and  
138 only a baseline scan was used for the following analyses. MRI data were acquired at the  
139 University of Maryland, Baltimore Medical Imaging Facility with a Siemens 3T Tim Trio scanner  
140 with 32 channel head coil (n=22) or a Siemens 3T Prisma scanner with a 64 channel head coil

141 (n=14) due to a scanner upgrade during data acquisition. We acquired a T1 weighted structural  
142 3D MPRAGE scan that was used in preprocessing (whole brain coverage, TR=2300ms,  
143 TE=2.98ms, voxels=1.00 mm isotropic). We also acquired eyes-open resting state scans using  
144 EPI while subjects fixated on a plus sign (whole brain coverage, TR=2s, TE=28ms, voxels=3.4 x  
145 3.4 x 4.0 mm, slices=40, duration=300 TR). One subject was excluded due to poor coverage  
146 leaving 35 subjects (31 women, average age=37, s.d. = 13).

147 *3T-Task*: Participants in the *3T-Rest* also performed the multi-source interference task (MSIT;  
148 Bush et al., 2003) as a measure of cognitive conflict. Subjects were first trained on the MSIT  
149 outside of the scanner. During the MRI session, they performed the MSIT in two runs of about 5  
150 minutes each while echo planar imaging with whole brain coverage was acquired (TR=2500ms,  
151 TE=30ms, voxels=3.00 mm isotropic, slices=44, duration=121 TR). The task was the same as  
152 previously reported (Seminowicz and Davis, 2007, Seminowicz et al., 2011), but is briefly  
153 described here. On each trial, the volunteer was presented with an array of three numbers. In  
154 each array, two numbers were the same and one number was different. The volunteer was  
155 instructed to press a button that corresponded to the number that was different from the two  
156 other numbers or characters presented on the screen for that given trial. The control condition  
157 was a sequential tapping task in which an asterisk appeared in the same order moving from the  
158 left to the right of the screen and the subject pressed a button corresponding to the position of  
159 the asterisk. There were two levels of task difficulty (easy, difficult), which were performed in  
160 separate 20s blocks (10 stimuli per block). In the easy condition, the different number indicated  
161 the position of that number in the array (e.g. “1-2-2”, “3-2-3”, “1-1-3”), and in the difficult  
162 condition, the different number did not indicate the position of that number in the array (e.g. “3-  
163 2-2”, “3-1-3”, “1-1-2”). Three subjects were excluded because of poor coverage and missing  
164 data, leaving a sample size of 33 (29 women, average age=37 s.d.= 12).

165

166 *Initial Data Preprocessing*

167 Data were preprocessed in SPM12 (<http://www.fil.ion.ucl.ac.uk/spm/software/spm12/>), including  
168 slice timing correction, realignment (motion correction), coregistration of the T1-weighted  
169 structural scan to the mean realigned functional image, segmentation of the structural scan,  
170 normalization of the structural and realigned functional images to a standard MNI template, and  
171 smoothing with a 6mm full width at half maximum (FWHM) Gaussian kernel for *7T-Rest*, *3T-*  
172 *Rest*, and *3T-Task*. We elected to use the same smoothing kernel for 3T-Rest and 7T-Rest to  
173 have as comparable processing pipelines as possible. We did not observe obvious qualitative  
174 differences for smoothing *7T-Rest* at 6mm FWHM vs a 3mm FWHM kernel (S1).

175 *Analysis of resting state claustrum connectivity*

176 *Resting-state preprocessing.* Whole-brain *7T-Rest* and *3T-Rest* data underwent the following  
177 further preprocessing before functional connectivity analyses were performed. Resting-state  
178 preprocessing and seed-based analyses were conducted in the Conn toolbox version 17f  
179 (<http://www.nitrc.org/projects/conn>). Given continued controversy, we elected not to control for  
180 global signal in our analyses (Murphy and Fox, 2017). To control for noise present in white  
181 matter and CSF, we used aCompCor (Behzadi et al., 2007; Muschelli et al., 2014) to determine  
182 the first five eigenvectors of white matter and CSF. As we did not want to remove global signal,  
183 we used a twice eroded CSF mask and a white matter mask with four erosions (that did not  
184 include external or extreme capsules), as this level of erosion has been shown to no longer  
185 contain global signal (Power et al., 2017). We removed motion related signals estimated from  
186 the realignment parameters along with the first order derivatives of these parameters, in addition  
187 to the 10 eigenvectors from white matter and CSF. To avoid the reintroduction of noise while  
188 removing low frequency artifact, we used linear detrending and also simultaneously high pass  
189 filtered our voxelwise and regressor data with a cutoff of 0.008 Hz. No low pass filter was used  
190 because signal is present above standard cutoffs (~0.08 Hz, Smith et al., 2013). Despiking was



191 employed after these steps to remove any additional artifact that had not yet been removed  
192 (Petel et al., 2014).

### 193 *Standard analysis*

194 Following artifact removal, ROI analyses were performed by extracting the average timeseries  
195 of all voxels within a given set of ROIs using normalized, but not smoothed data. For each  
196 subject in *7T-Rest*, left and right claustrum ROIs were hand drawn on the subject's structural  
197 image, along with ROIs for the insula and putamen. Fig 1A shows an example tracing for one  
198 subject and Fig 1B shows the average ROIs on a group template. In *3T-Rest*, we used mean  
199 ROIs obtained from *7T-Rest*, after confirming that these mean images fit well onto the  
200 normalized structural data for *3T-Rest*. Functional connectivity was calculated as the Pearson  
201 correlation between the timeseries for each ROI and all voxel timeseries across the brain. In the  
202 standard analysis for *7T-Rest*, we used the un-corrected claustrum, whole insula, and whole  
203 putamen timeseries from individually drawn ROIs to compute RSFC across the whole brain.

### 204 *Corrected claustrum analysis with Small Region Confound Correction (SRCC)*

205 To remove the possible influence of insula and putamen signals on claustrum timeseries and  
206 hence FC, we determined the timeseries of parts of the insula and putamen that 'flanked' the  
207 claustrum and treated these as confounding sources for the claustrum. These flanked ROIs  
208 were calculated on the individual level for *7T-Rest* by dilating the claustrum 4 functional voxels  
209 (6 mm), and determining the overlap between the dilated claustrum and the insula/putamen  
210 seeds that were at least 2 functional voxels (3 mm) separated from the original claustrum. This  
211 resulted in 'flanking' regions that were continuous with insula and putamen and similar in shape  
212 to the claustrum, but still distant enough from the claustrum to ensure that they contained no  
213 claustrum data within the seed, as shown in Fig 1C. We call this approach Small Region  
214 Confound Correction (SRCC), as it is designed to eliminate partial volume effects that are

215 particularly problematic in small regions of the brain. In *3T-Rest*, this process was repeated, but  
216 for the mean ROIs only. We regressed each claustrum timeseries (left and right) on the  
217 timeseries from the ipsilateral ‘flanking’ regions, along with previously described artifacts  
218 (motion, CSF, etc.), and the residuals from this analysis constituted a corrected claustrum  
219 timeseries (e.g. corrected for signal in the flanking insula and putamen sources) that was then  
220 used as the seed in whole-brain seed-to-voxel analysis.

221 To determine statistical significance of seed-to-voxel functional connectivity maps, we  
222 performed one sample t-tests in SPM12 for each RSFC map (left and right corrected claustrum).  
223 These outputs were used for qualitative comparisons between regions. A cluster-forming  
224 threshold of  $p < 0.001$  was used for all analyses and significant clusters based on FWE  
225 correction are reported, as these thresholds have been shown to adequately control for false  
226 positive rates (Woo et al., 2014).

### 227 *Modelling task data*

228 We determined the reaction time (RT) for every trial presented in the MSIT. If the participant did  
229 not respond to a particular trial, we designated the RT for that trial as the maximum possible trial  
230 duration (i.e. 1500ms). We did not analyze accuracy, as the average was over 90 percent.  
231 Typically, the MSIT is modelled in a blocked design, using three types of blocks (tapping, easy,  
232 and difficult). However, based on observations of behavioral performance suggesting that the  
233 first one to three trials had much poorer performance (see Results) – likely reflecting the  
234 cognitive adaptations (or switching) to a new set of rules – we modelled onset and block  
235 separately, using an event design to model task onset and a block design to model the  
236 remainder of the task.

### 237 *Preprocessing*

238 For whole brain task analyses, we did not treat insula and putamen signals as a source of noise.

239 For analyses of claustrum activation we used similar approaches as described in *Analysis of*  
240 *resting state claustrum connectivity and corrected claustrum analysis with SRCC* (see above)

241 except we did not include despiking nor the first derivative of realignment parameters. This  
242 approach created a corrected claustrum timeseries during MSIT that was then used to  
243 determine claustrum activation during the task. We then estimated whole brain and corrected  
244 claustrum ROI activation patterns.

#### 245 *Analysis*

246 To determine significant task activation for whole brain analyses, we performed one sample t-  
247 tests for contrast maps with a cluster-forming threshold of  $p < 0.001$  and a FWE cluster  
248 correction. Contrast maps for difficult and easy blocks and onsets were calculated based on a  
249 tapping baseline (e.g. [difficult > tapping] and [easy > tapping]). To determine claustrum  
250 activation, we performed a one-sample t-test on extracted activation estimates for each contrast  
251 extracted using MarsBaR v 0.44 (<http://marsbar.sourceforge.net/>). To examine the overlap  
252 between claustrum connectivity and task-related activation during MSIT, we created an overlap  
253 map between areas of significant deactivation/activation and areas with significant claustrum  
254 functional connectivity. We then used this overlap map to calculate the percentage of task-  
255 responding voxels that functionally connected with the claustrum. Average RT for each task  
256 condition (tapping, easy, difficult) was calculated for each subject, and these subject-averaged  
257 RTs were compared between each task type using a one-way repeated measures ANOVA with  
258 Greenhouse-Geisser correction. Post-hoc t-tests were used to identify specific task type  
259 differences with Tukey's correction for multiple comparisons. We also performed a one-way  
260 ANOVA with Greenhouse-Geisser correction and used a Dunnett's test to compare the first trial  
261 to all other trials. Whole brain contrast of difficult vs easy tasks gave task-positive  
262 (difficult>easy, EMN) and task-negative (easy>difficult, DMN) networks. For event-related plots

263 in Fig 4C, we extracted timeseries  
264 data for the claustrum and for EMN  
265 and DMN. These timeseries were  
266 each averaged for the task of  
267 interest.

268

## 269 Results

270 *Resting state connectivity of the*  
271 *claustrum at 7T: methodological*  
272 *approach*

273 We used high spatial resolution fMRI  
274 data in *7T-Rest* and hand drawn  
275 ROIs of claustrum, insula, and  
276 putamen to analyze whole brain  
277 functional connectivity of these ROIs.  
278 Despite excellent resolution, we  
279 found that functional connectivity  
280 between the claustrum and the  
281 insula/putamen in this standard  
282 analysis was high (average FC of L/R  
283 claustrum with insula/putamen  
284 ranged from 0.32 to 0.5; Fig 1D). This  
285 contrasts with known unique  
286 connectivity of the claustrum relative

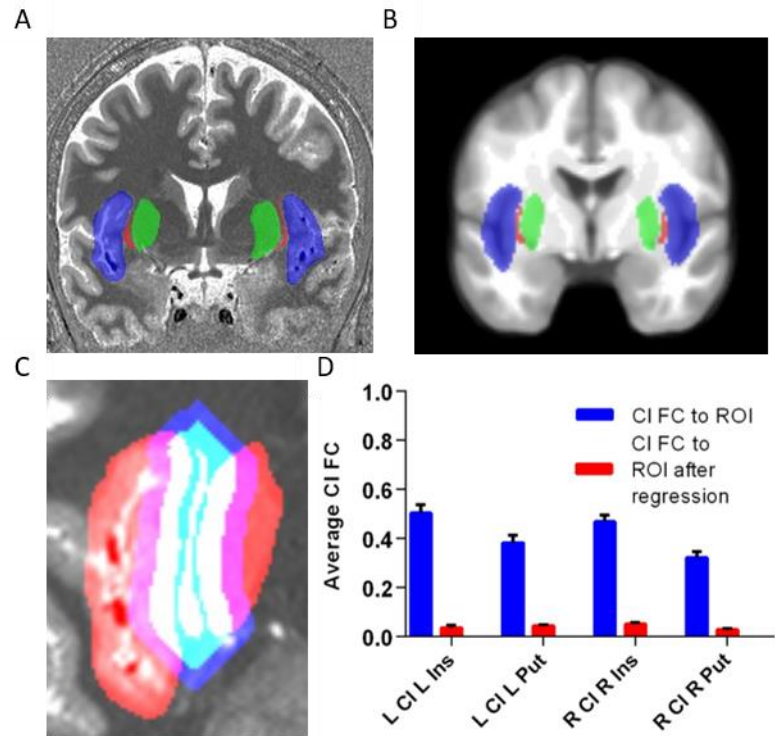

Fig 1. The claustrum is a thin sheet of gray matter and its fMRI signal is normally confounded by neighboring structures. A) Structural MRI image with insula (blue), claustrum (red), and putamen (green) for one subject. These regions were hand-drawn for each subject on their native anatomical image. B) Average insula (blue), claustrum (red), and putamen (green) averaged over 20 hand-drawn images displayed on an average template. C) To remove signal from neighboring structures, the claustrum was dilated, adding 6 mm around the claustrum, while maintaining its shape (blue). This dilated claustrum was overlapped with the neighboring insula and putamen (red). Voxels that contained insula/putamen and dilated claustrum separated by at least 3mm from the original claustrum were categorized as flanking regions. Flanking regions, shown in purple, were regressed out of the claustrum signal to create a corrected claustrum timeseries. D) Correlation (FC) of claustrum timeseries with L/R insula/putamen before and after regressing out flanking regions (i.e. following Small Region Confound Correction (SRCC)). The average connectivity between claustrum and its neighbors approaches zero following this approach. Error bars show standard error of the mean. Cl=claustrum, Ins=insula, Put=putamen, ROI=region of interest, FC=functional connectivity.

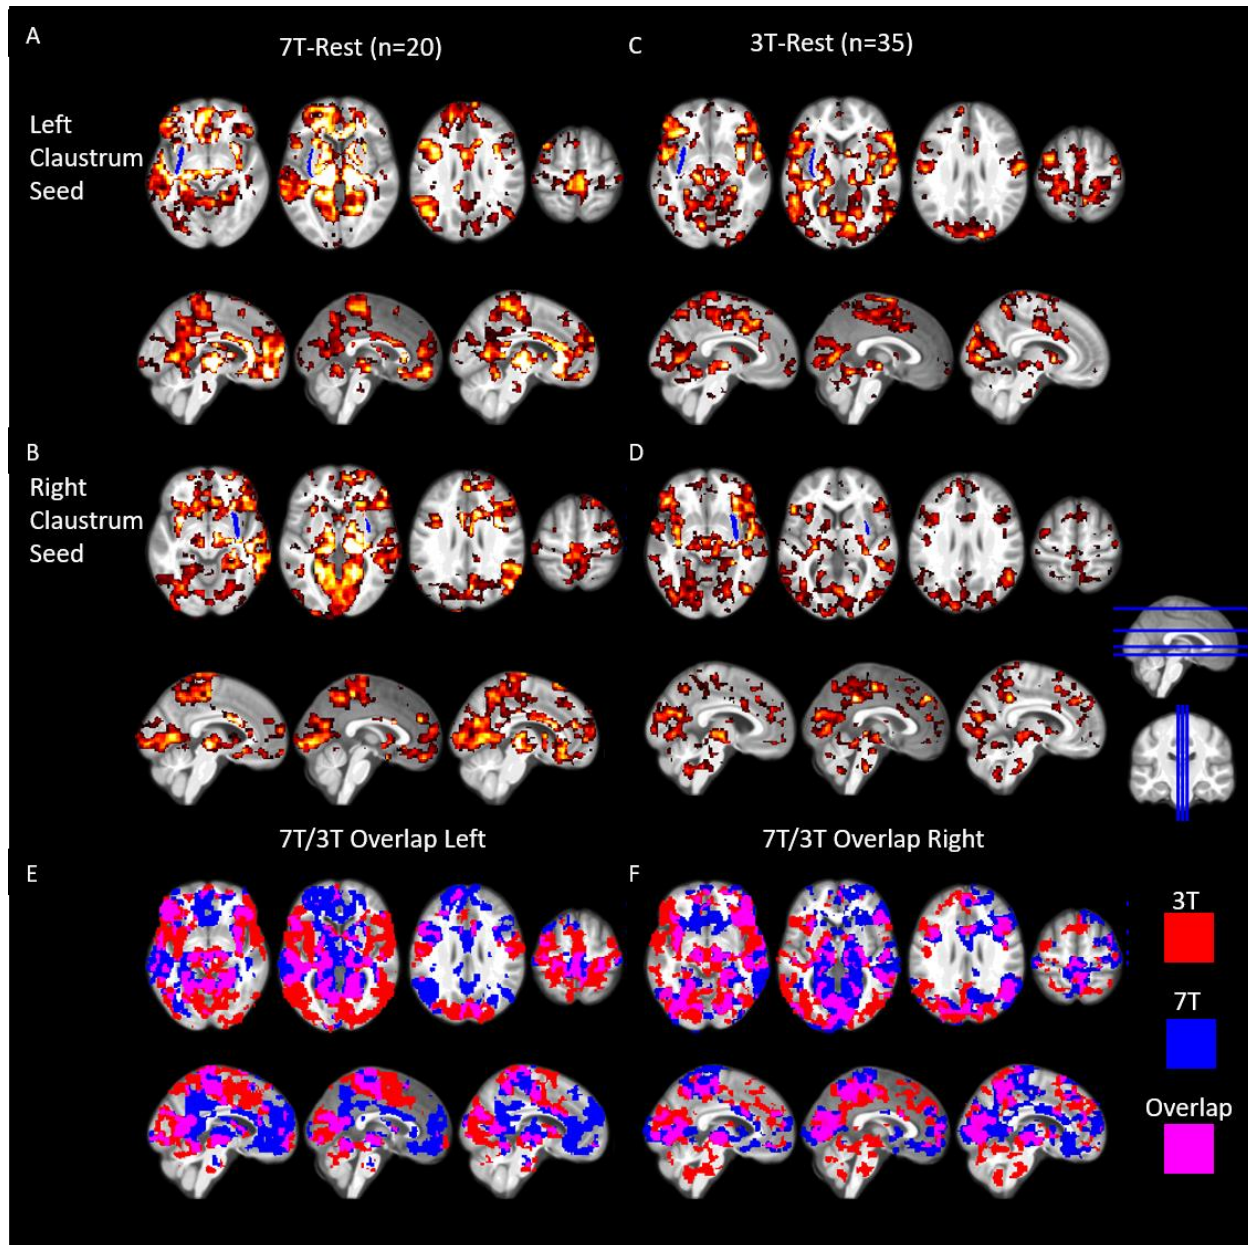

Fig 2. Resting state connectivity of the left and right claustrum at 7T and 3T showing widespread connectivity to cortical and subcortical regions. A) RSFC of the left claustrum in 7T-Rest. B) RSFC of the right claustrum in 7T-Rest. C) RSFC of the left claustrum in 3T-Rest. D) RSFC of the right claustrum in 3T-Data. E) and F) show the overlap of these thresholded RSFC maps. Data were voxelwisethresholded at  $p < 0.001$  followed by FWE cluster correction. Blue ROI in A-D represents an average claustrum dilated by 1.5 mm (for visualization only). Cl=claustrum.

287 to insula and putamen (Nakashima et al., 2000; Mathur et al., 2009; Pan et al., 2010; Sato et al.,  
288 2013; Wang et al., 2017), and suggests that even with high spatial resolution and well identified  
289 ROIs that insula and putamen signals are sampled in claustrum voxels. This confounds the

290 interpretation of small structure studies  
291 in fMRI even when the regions can be  
292 identified with relative ease in structural  
293 scans.

### 294 *Creating a corrected claustrum signal* 295 *with SRCC*

296 To mitigate the effect of insula/putamen  
297 sampling in claustrum voxels, we  
298 generated a corrected claustrum  
299 timeseries using SRCC by regressing  
300 out signal from insula and putamen  
301 regions separated by two voxels from  
302 claustrum (3 mm) as sources of noise,  
303 identical to how nuisance white matter  
304 (WM) and cerebro-spinal fluid (CSF)  
305 signals are treated (see Fig 1C). This  
306 approach eliminated the linear  
307 relationship between claustrum and the  
308 surrounding structures, and the resulting  
309 average correlation between the  
310 corrected claustrum timeseries and  
311 neighboring regions reduced effectively  
312 to zero (Fig 1D).

### 313 *Resting state connectivity of the corrected claustrum at 7T and 3T*

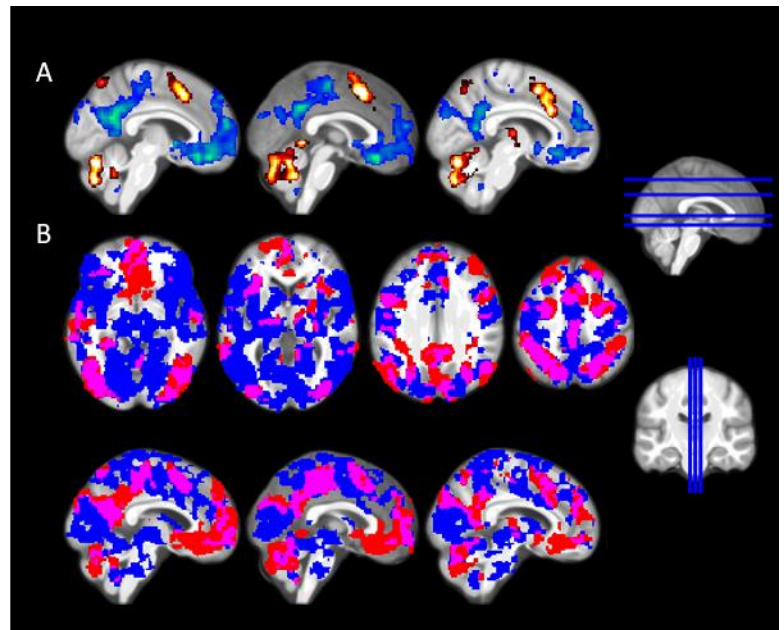

C

Fig 3. Claustrum functional connectivity substantially overlaps with DMN and EMN. A) Contrasting the difficult block and the easy block of MSIT reveals DMN (easy>difficult, shown in blue) and EMN (difficult>easy, shown in red). B) Areas functionally connected with L/R claustrum in 3T-Rest (blue) and the DMN and EMN shown above (red) show a high degree of overlap (purple) C) Quantification of DMN/EMN voxels from panel A and the percent that also have FC with claustrum. Claustrum FC maps are the same as shown in Figure 2B. Task contrasts maps used a  $p < 0.001$  threshold with FWE cluster correction. Easy=easy condition of MSIT, Diff=Difficult condition of MSIT, CI=claustrum, DMN=default mode network, EMN=extrinsic mode network.

314 We estimated functional connectivity of the corrected claustrum timeseries across the whole  
315 brain in two datasets. Given previous findings in rats (White et al., 2017), we anticipated  
316 claustrum RSFC to be widespread and to feature connectivity with cingulate cortex, PFC, visual  
317 cortex, and intraparietal sulcus (IPS), among other regions. In *7T-Rest*, this analysis identified  
318 connectivity with the: thalamus, particularly the pulvinar; nucleus accumbens; visual cortex; both  
319 anterior and posterior cingulate cortex; PFC (including the dorsal lateral PFC, medial PFC, and  
320 ventral lateral PFC); precuneus; angular gyrus; sensorimotor cortex; parahippocampal gyrus;  
321 superior and inferior temporal gyri; and IPS (Fig 2A and B and Table S1 and S2).

322 We found a more extensive pattern of claustrum functional connectivity in *3T-Rest*, however, the  
323 regions displaying FC with claustrum were largely similar to *7T-Rest*. In *3T-Rest* we identified  
324 connectivity with: the thalamus, mainly the pulvinar; nucleus accumbens; visual cortex; both  
325 anterior and posterior cingulate cortex; PFC, precuneus; angular gyrus; sensorimotor cortex;  
326 parahippocampal gyrus; temporal gyri; and IPS (Fig 2C and D and Table S3 and S4). The  
327 similar pattern of claustrum functional connectivity across *7T-Rest* and *3T-Rest*, and the  
328 bilateral nature of claustrum functional connectivity (i.e. left claustrum functionally connects with  
329 right) suggest our confound-corrected claustrum timeseries is not artifactual.

### 330 *Extrinsic and Default Mode Network overlap with claustrum functional connectivity*

331 Given the high degree of claustrum functional connectivity with regions involved in cognitive  
332 control (e.g. ACC) and prior literature showing claustrum involvement in top-down cognitive  
333 processing (White et al., 2018), we sought to quantify the overlap between resting-state  
334 claustrum connectivity, the cognitive conflict task positive network (i.e. extrinsic mode network;  
335 EMN) (Hugdahl., 2015) and the task negative network (i.e. default mode network; DMN)  
336 (Raichle et al., 2001) evoked by the multi-source interference task (MSIT; Bush et al., 2003).  
337 MSIT features a difficult condition where there is conflict between the position and identity of a  
338 number that must be selected and an easy condition, where there is no conflict. The neural

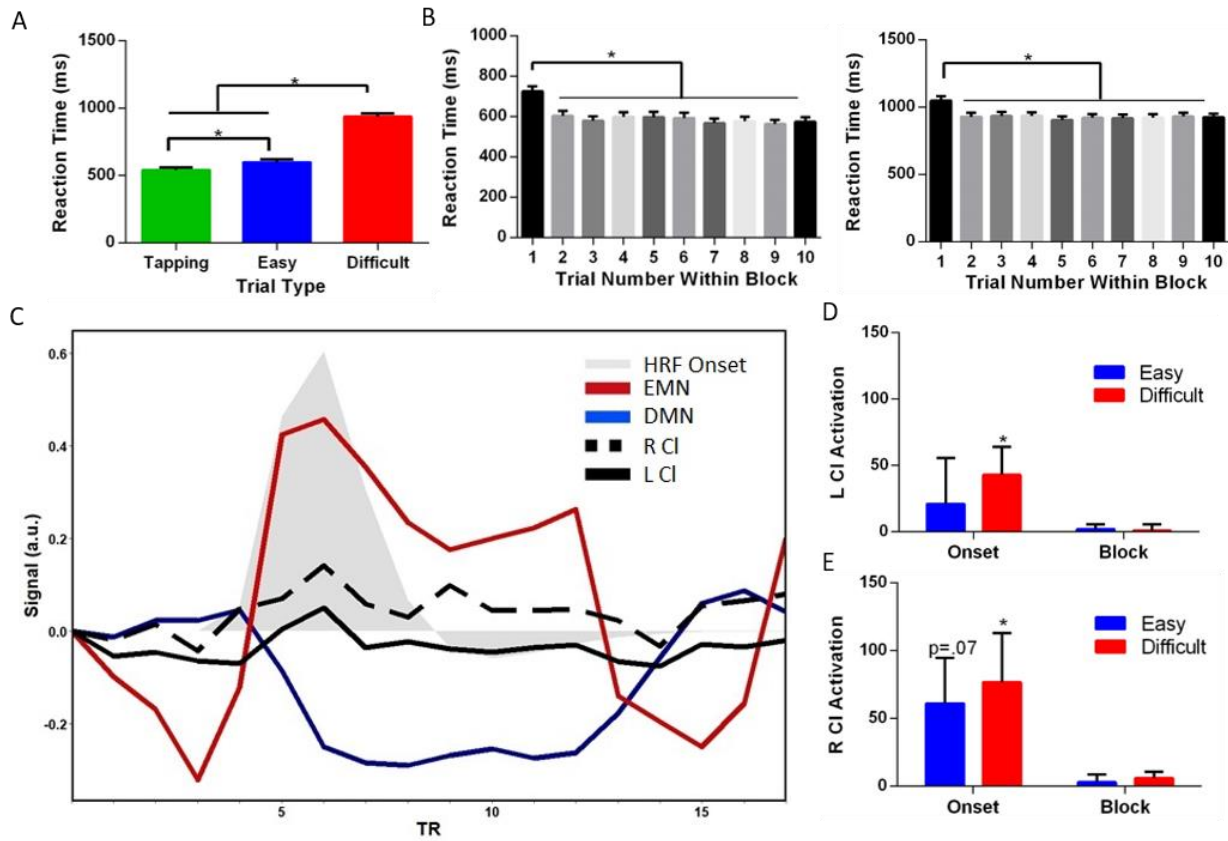

Fig 4. Claustrum activates when cognitive load peaks. A) Reaction time performance in MSIT varies based on the condition, with the difficult blocks having the slowest reaction times. B) The first trial of the easy and difficult conditions is behaviorally unique from the other trials in the block. As a result, we modelled the onset separately from the remainder of the block for difficult and easy conditions in an adaptive model to capture individual variability. C) Time course of claustrum shows a response during the difficult task, but exclusively during the onset of that task. The contrast map localizing DMN and the contrast map localizing EMN (Fig 3A) were used as regions of interest. We extracted the signal from these areas along with the left and right claustrum averaged over every difficult condition for all subjects. The task starts at the third TR and ends at the 11<sup>th</sup>. TRs 1:2 and 12:15 show the control condition. We under laid a canonical hemodynamic response function (HRF) convolved with an onset of duration 3.2 second (two trials in duration). D) Left and E) right claustrum activates at the onset – but not block – of the difficult MSIT condition. Error bars show standard error of the mean. \* represents a p value of <0.05. HRF=Hemodynamic Response Function, CI=claustrum, DMN=default mode network, EMN=extrinsic mode network.

339 activation associated with these conditions are contrasted to a motor and visual control  
 340 condition. Examining the difficult-block greater than easy-block contrast identified the standard  
 341 EMN, including fronto-parietal network (FPN), dorsal-attention network (DAN), and dorsal ACC  
 342 (Fox et al., 2005; see Fig 3A and Table S5). The easy-block greater than difficult-block contrast  
 343 identified the DMN. We found left and right claustrum functional connectivity overlapped with



344 more than half of the regions in both the extrinsic mode and default mode networks (Fig 3C).  
345 Additionally, every major region with significant task activation was also functionally connected  
346 to the claustrum (i.e. at least partially overlapped).

#### 347 *MSIT performance*

348 Consistent with past literature, we found a main effect of reaction time (RT;  $F_{1.76,56.38}=374.2$ ,  
349  $p<0.05$ ), with RT for tapping<easy<difficult trials within the MSIT, and all trial types differed from  
350 one another in terms of RT (Fig 4A).

351 When analyzing RT at the group level, we observed that RT was significantly higher for the first  
352 trial of easy and difficult blocks than the remaining 9 trials, a finding observed in many cognitive  
353 tasks (Blais et al., 2014) (Fig 4B) (Difficult:  $F_{6.27,200.7}=44.17$ ,  $p<0.05$ ; Easy:  $F_{4.33,138.5}=25.43$ ,  
354  $p<0.05$ ). These data suggest that after the first trial participants transition into a stable level of  
355 performance and therefore the beginning or onset of difficult and easy conditions should be  
356 modelled separately from the block (creating 5 conditions to be modelled: tapping, easy onset,  
357 easy block, difficult onset, difficult block). While at the group level a transition from high initial RT  
358 for the first trial to a near-mean RT by the second trial occurred, we observed variability within  
359 subjects and found that subjects sometimes took longer to transition into this stable level of  
360 performance where RT was close to the block mean. That is, for a given block of stimuli some  
361 subjects had clearly slower RTs for both the first and second/third trials relative to the RT mean.  
362 In order to capture this inter- and intra- individual variation as well as possible, we allowed the  
363 duration of the easy onset and difficult onset to vary based on RT of the subject. For start time  
364 of onset events, we used the beginning of the task block. For duration, we created an adaptive  
365 program that defined the duration of the easy onset and difficult onset events as either the first  
366 trial RT, the second trial RT (+ trial one duration of 1.6 s), or the third trial RT (+ trial one and  
367 two duration of 3.2 s). The choice of which trial RT to use as duration (one, two, or three) was  
368 based on the z scores for each of these trials using the mean calculated for each subject of the

369 same task type (difficult or easy) for the fourth to tenth trials over all runs. Specifically, trial one  
370 RT was the onset duration if trial two had a z-score  $\leq$  to 0.5; trail two was used if trail one RT  
371 had a z score  $>$  0.5 and if trial three had a z score  $\leq$  to 0.5; trial three was used if these prior  
372 stipulations were not met. Hence, the onset event duration was adapted based on individual  
373 level behavioral data, which ensured that for each subject we captured the period of greatest  
374 cognitive conflict, reflective of the switch to a new task. The block of the task type was modelled  
375 as the remainder of the block not included in onset. We used this hybrid event-block design for  
376 all task analysis of MSIT and found activations and deactivations for the onset and block for  
377 both easy and difficult conditions across the brain (Table S5, S6, S7, and S8).

#### 378 *Clastrum responds to the switch to task onset*

379 The onset of tasks involved switching from performing a tapping visuomotor control task to  
380 performing either a no-cognitive conflict easy task or a cognitive conflict difficult task. When  
381 analyzing claustrum activation independent of surrounding insula and putamen using this RT  
382 adaptive model, we found that claustrum significantly responded to difficult onset (Left:  $t_{32}=2.1$ ,  
383  $p<0.05$ ; Right:  $t_{32}=2.2$ ,  $p<0.05$ ), though the same effect was not found for easy onset (Left:  
384  $t_{32}=0.6$ ,  $p>.2$ ; Right:  $t_{32}=1.8$ ,  $p=0.07$ , Fig 4D-E). However, we found no evidence that claustrum  
385 responded to the difficult block nor to the easy block and found no evidence that claustrum  
386 responded to difficult onset more than to easy onset (all  $p>0.2$ ). This strongly suggests that  
387 claustrum is involved in the switch to active cognitive control, rather than maintaining  
388 performance during high cognitive demand.

#### 389 **Discussion**

390 In this study, we provide a novel approach we term Small Region Confound Correction to detect  
391 the activity and functional connectivity of the human claustrum. In doing so, we find that the  
392 claustrum is strongly functionally connected to cingulate and prefrontal cortices at rest and that

393 there is considerable overlap between claustrum connectivity maps and cognitive task-related  
394 networks. Supporting a role of the claustrum in cognition, we show that claustrum is activated at  
395 the onset of a demanding cognitive task, which is also associated with the onset of EMN  
396 engagement.

397 We isolated a distinct claustrum signal by regressing putamen and insula signals from the  
398 claustrum. This is a conservative approach, assuming that any linear relationship between  
399 claustrum and insula/putamen is a result of a partial volume effect, defined as signal from  
400 outside structures being erroneously incorporated into an ROI by virtue of the ROI only  
401 occupying a portion of a measured volume (Dukart and Bertolino, 2014; Du et al., 2014). Thus,  
402 while our approach mitigates the partial volume effect, a degree of true claustrum signal may be  
403 dampened. However, our resting state analyses showing similar RSFC across left/right  
404 claustrum, similar RSFC over two datasets, bilateral claustrum RSFC, and task response of the  
405 claustrum, argue that the signal that we do derive is sufficiently robust. This approach offers a  
406 generalizable method to assay the function of the claustrum, or other small or oddly shaped  
407 neural structures, independent of partial volume effects from surrounding structures. SRCC  
408 serves as a platform for studying a host of regions across the brain, such as the habenula  
409 (Shelton et al., 2012; Hetu et al., 2016) and other thalamic association nuclei.

410 Our claustrum functional connectivity data reveals co-activation of claustrum with executive  
411 cortical regions including ACC and medial PFC. This is in line with decades of neuronal tract  
412 tracing studies from rodent to monkeys (for review see Mathur, 2014), and particularly in line  
413 with reports in rat indicating dense claustrum connections with ACC and prelimbic PFC (Smith  
414 and Alloway, 2010; White et al., 2017) and in with area 24 in the common marmoset (Reser et  
415 al., 2017). The present work also indicates that claustrum is functionally connected to posterior  
416 cingulate cortex, precuneus, angular gyrus, cuneus, visual cortex, and sensorimotor cortex,  
417 which is in line with connections from claustrum to parietal association cortex and sensorimotor

418 cortices in rats (White et al., 2017), connections from claustrum to visual cortex in cats (LeVay  
419 and Sherk, 1981) and projections from claustrum to parietal cortex in monkeys (Gamberini et  
420 al., 2017). The more extensive pattern of claustrum functional connectivity observed in *3T-Rest*  
421 may be a result of the larger sample size compared to *7T-Rest* (35 for 3T vs. 20 for 7T). The  
422 additional functional connectivity seen in *3T-Rest* with midbrain and nucleus accumbens in  
423 particular, is likely to reflect indirect connectivity as direct connections between these regions  
424 are not currently strongly supported in the tract tracing literature. Alternatively, functional  
425 connectivity of claustrum with these structures may reflect connections that are unique to the  
426 human brain.

427 Our data also suggest involvement of the claustrum at the start of a difficult condition when new  
428 rules come into play that require a change of cognitive strategy and task set instantiation  
429 (Dosenbach et al., 2006). Significant claustrum activation was only observed at the switch from  
430 the stimulus-response-based tapping task to the difficult condition of MSIT. As subjects  
431 transitioned to this new rule set, average reaction time decreased significantly compared with  
432 later trials in the task block. This transition also was met with an emergence of the task  
433 positive/extrinsic mode network. A possible interpretation of these data could be that the  
434 claustrum is involved in action inhibition as cognitive demand soars. However, neither  
435 optogenetic inhibition nor activation of axon terminals of a major excitatory input source to the  
436 claustrum, the ACC, affects motor activity in mice (White et al., 2018). Our results cannot be  
437 explained through alterations in sensory binding or motor processes, which are both proposed  
438 roles for the claustrum, as we observed claustrum activation when controlling for sensory input  
439 and motor responses. The data also do not suggest a role for claustrum in resolving cognitive  
440 conflict, as claustrum did not show sustained activation during the block of the difficult condition,  
441 whereas the EMN did (Fig 3A).

442 In summary, we showed that even at 1.5mm spatial resolution attained with 7T fMRI, the  
443 claustrum BOLD signal bears unsettling similarity with the insula and putamen, and an  
444 additional processing step of SRCC allowed us to isolate a claustrum signal independent of the  
445 surrounding regions. Using this method we find that in in the human – like in other species – the  
446 claustrum has wide-ranging cortical connectivity, including default and extrinsic mode networks,  
447 to sensory regions. Additionally, we show that claustrum activity peaks when switching to a  
448 cognitive conflict task and that this activity could not be explained by changes in consciousness  
449 or sensorimotor processing. These data broadly support a role of the claustrum in cognitive  
450 control and are consistent with recent studies in mice (White et al., 2017).

#### 451 References

- 452 1. Behzadi, Y., Restom, K., Liu, J., & Liu, T. T. (2007). A component based noise  
453 correction method (CompCor) for BOLD and perfusion based fMRI. *Neuroimage*, 37(1),  
454 90-101.
- 455 2. Blais, C., Stefanidi, A., & Brewer, G. A. (2014). The gratton effect remains after  
456 controlling for contingencies and stimulus repetitions. *Frontiers in Psychology*, 5, 1207.
- 457 3. Bush, G., Shin, L., Holmes, J., Rosen, B., & Vogt, B. (2003). The multi-source  
458 interference task: Validation study with fMRI in individual subjects. *Molecular Psychiatry*,  
459 8(1), 60.
- 460 4. Crick, F. C., & Koch, C. (2005). What is the function of the claustrum? *Philosophical*  
461 *Transactions of the Royal Society of London. Series B, Biological Sciences*, 360(1458),  
462 1271-1279.
- 463 5. Dosenbach, N. U., Visscher, K. M., Palmer, E. D., Miezin, F. M., Wenger, K. K., Kang, H.  
464 C., Burgund, D., Grimes, A. L., Schlaggar, B. L., & Petersen, S. E. (2006). A core system  
465 for the implementation of task sets. *Neuron*, 50(5), 799-812.
- 466 6. Du, Y. P., Chu, R., & Tregellas, J. R. (2014). Enhancing the detection of BOLD signal in  
467 fMRI by reducing the partial volume effect. *Computational and Mathematical Methods in*  
468 *Medicine*, 2014, 973972.
- 469 7. Dukart, J., & Bertolino, A. (2014). When structure affects function—the need for partial  
470 volume effect correction in functional and resting state magnetic resonance imaging  
471 studies. *PloS One*, 9(12), e114227.
- 472 8. Edelstein, L., & Denaro, F. (2004). The claustrum: A historical review of its anatomy,  
473 physiology, cytochemistry and functional significance. *Cellular and molecular biology*,  
474 50:675-702.
- 475 9. Fox, M. D., Snyder, A. Z., Vincent, J. L., Corbetta, M., Van Essen, D. C., & Raichle, M.  
476 E. (2005). The human brain is intrinsically organized into dynamic, anticorrelated  
477 functional networks. *Proceedings of the National Academy of Sciences of the United*  
478 *States of America*, 102(27), 9673-9678.
- 479 10. Gamberini, M., Passarelli, L., Bakola, S., Impieri, D., Fattori, P., Rosa, M. G., & Galletti,  
480 C. (2017). Claustral afferents of superior parietal areas PEc and PE in the macaque.  
481 *Journal of Comparative Neurology*, 525(6), 1475-1488.

- 482 11. Gorgolewski, K. J., Mendes, N., Wilfling, D., Wladimirow, E., Gauthier, C. J., Bonnen, T.,  
483 Cozatl, R. (2015). A high resolution 7-tesla resting-state fMRI test-retest dataset with  
484 cognitive and physiological measures. *Scientific Data*, 2, 140054.
- 485 12. Hetu, S., Luo, Y., Saez, I., D'ardenne, K., Lohrenz, T., & Montague, P. R. (2016).  
486 Asymmetry in functional connectivity of the human habenula revealed by high-resolution  
487 cardiac-gated resting state imaging. *Human Brain Mapping*, 37(7), 2602-2615.
- 488 13. Hugdahl, K., Raichle, M. E., Mitra, A., & Specht, K. (2015). On the existence of a  
489 generalized non-specific task-dependent network. *Frontiers in Human Neuroscience*, 9,  
490 430.
- 491 14. LeVay, S., & Sherk, H. (1981). The visual claustrum of the cat. I. structure and  
492 connections. *The Journal of Neuroscience*, 1(9), 956-980.
- 493 15. Mathur, B. N. (2014). The claustrum in review. *Frontiers in Systems Neuroscience*, 8,  
494 48.
- 495 16. Mathur, B. N., Caprioli, R. M., & Deutch, A. Y. (2009). Proteomic analysis illuminates a  
496 novel structural definition of the claustrum and insula. *Cerebral Cortex*, 19(10), 2372-  
497 2379.
- 498 17. Murphy, K., & Fox, M. D. (2017). Towards a consensus regarding global signal  
499 regression for resting state functional connectivity MRI. *Neuroimage*, 154, 169-173.
- 500 18. Muschelli, J., Nebel, M. B., Caffo, B. S., Barber, A. D., Pekar, J. J., & Mostofsky, S. H.  
501 (2014). Reduction of motion-related artifacts in resting state fMRI using aCompCor.  
502 *Neuroimage*, 96, 22-35.
- 503 19. Nakashima, M., Uemura, M., Yasui, K., Ozaki, H. S., Tabata, S., & Taen, A. (2000). An  
504 anterograde and retrograde tract-tracing study on the projections from the thalamic  
505 gustatory area in the rat: Distribution of neurons projecting to the insular cortex and  
506 amygdaloid complex. *Neuroscience Research*, 36(4), 297-309.
- 507 20. Pan, W. X., Mao, T., & Dudman, J. T. (2010). Inputs to the dorsal striatum of the mouse  
508 reflect the parallel circuit architecture of the forebrain. *Frontiers in Neuroanatomy*, 4,  
509 147.
- 510 21. Patel, A. X., Kundu, P., Rubinov, M., Jones, P. S., Vértes, P. E., Ersche, K. D., Suckling,  
511 J., Bullmore, E. T. (2014). A wavelet method for modeling and despiking motion artifacts  
512 from resting-state fMRI time series. *Neuroimage*, 95, 287-304.
- 513 22. Power, J. D., Plitt, M., Laumann, T. O., & Martin, A. (2017). Sources and implications of  
514 whole-brain fMRI signals in humans. *Neuroimage*, 146, 609-625.
- 515 23. Raichle, M. E., MacLeod, A. M., Snyder, A. Z., Powers, W. J., Gusnard, D. A., &  
516 Shulman, G. L. (2001). A default mode of brain function. *Proceedings of the National  
517 Academy of Sciences of the United States of America*, 98(2), 676-682.
- 518 24. Reser, D. H., Majka, P., Snell, S., Chan, J. M., Watkins, K., Worthy, K., Quiroga, M. D.,  
519 & Rosa, M. G. (2017). Topography of claustrum and insula projections to medial  
520 prefrontal and anterior cingulate cortices of the common marmoset (*Callithrix jacchus*).  
521 *Journal of Comparative Neurology*, 525(6), 1421-1441.
- 522 25. Sato, F., Akhter, F., Haque, T., Kato, T., Takeda, R., Nagase, Y., Yoshida, A. (2013).  
523 Projections from the insular cortex to pain-receptive trigeminal caudal subnucleus  
524 (medullary dorsal horn) and other lower brainstem areas in rats. *Neuroscience*, 233, 9-  
525 27.
- 526 26. Seminowicz, D. A., & Davis, K. D. (2007). Pain enhances functional connectivity of a  
527 brain network evoked by performance of a cognitive task. *Journal of Neurophysiology*,  
528 97(5), 3651-3659.
- 529 27. Seminowicz, D. A., Wideman, T. H., Naso, L., Hatami-Khoroushahi, Z., Fallatah, S.,  
530 Ware, M. A., Stone, L. S. (2011). Effective treatment of chronic low back pain in humans  
531 reverses abnormal brain anatomy and function. *The Journal of Neuroscience*, 31(20),  
532 7540-7550. doi:10.1523/JNEUROSCI.5280-10.2011 [doi]

- 533 28. Shelton, L., Pendse, G., Maleki, N., Moulton, E. A., Lebel, A., Becerra, L., & Borsook, D.  
534 (2012). Mapping pain activation and connectivity of the human habenula. *Journal of*  
535 *Neurophysiology*, 107(10), 2633-2648.
- 536 29. Smith, J. B., & Alloway, K. D. (2010). Functional specificity of claustrum connections in  
537 the rat: Interhemispheric communication between specific parts of motor cortex. *The*  
538 *Journal of Neuroscience*, 30(50), 16832-16844.
- 539 30. Smith, J. B., Radhakrishnan, H., & Alloway, K. D. (2012). Rat claustrum coordinates but  
540 does not integrate somatosensory and motor cortical information. *Journal of*  
541 *Neuroscience*, 32(25), 8583-8588.
- 542 31. Smith, S. M., Beckmann, C. F., Andersson, J., Auerbach, E. J., Bijsterbosch, J., Douaud,  
543 G., Harms, M. P. (2013). Resting-state fMRI in the human connectome project.  
544 *Neuroimage*, 80, 144-168.
- 545 32. Torgerson, C. M., Irimia, A., Goh, S., & Van Horn, J. D. (2015). The DTI connectivity of  
546 the human claustrum. *Human Brain Mapping*, 36(3), 827-838.
- 547 33. Wang, Q., Ng, L., Harris, J. A., Feng, D., Li, Y., Royall, J. J., Koch, C. (2017).  
548 Organization of the connections between claustrum and cortex in the mouse. *Journal of*  
549 *Comparative Neurology*, 525(6), 1317-1346.
- 550 34. White, M. G., & Mathur, B. N. (2018). Frontal cortical control of posterior sensory and  
551 association cortices through the claustrum. *Brain Structure and Function*, 1-8.
- 552 35. White, M. G., Cody, P. A., Bubser, M., Wang, H., Deutch, A. Y., & Mathur, B. N. (2017).  
553 Cortical hierarchy governs rat claustrum circuit organization. *Journal of*  
554 *Comparative Neurology*, 525(6), 1347-1362.
- 555 36. White, M. G., Panicker, M., Mu, C., Carter, A. M., Roberts, B. M., Dharmasri, P. A., &  
556 Mathur, B. N. (2018). Anterior cingulate cortex input to the claustrum is required for top-  
557 down action control. *Cell Reports*, 22(1), 84-95.
- 558 37. Woo, C., Krishnan, A., & Wager, T. D. (2014). Cluster-extent based thresholding in fMRI  
559 analyses: Pitfalls and recommendations. *Neuroimage*, 91, 412-419.
